# Supplementary material
Source: Research Square preprint supplement (doi:10.21203/rs.3.rs-8764864/v1)
Supplement: Supplementary file 3 [file a24629a076dd7b897c381d03.xlsx]

## Sheet: Sheet1
genes	Estimate	Pr...t..	padj
SCO1	0.0121983	2.35419e-10	4.88377e-06
IMPAD1	0.00807481	3.068e-10	6.36427e-06
ZNF69	-0.00495567	1.37687e-09	2.85604e-05
DUSP19	-0.00520308	1.41322e-09	2.93129e-05
LMOD3	-0.00419103	1.64142e-09	3.40447e-05
ITPK1-AS1	-0.00525575	5.83951e-09	0.000121111
SEC61G	0.0143324	7.86585e-09	0.00016313
SYNCRIP	0.0101945	9.37383e-09	0.000194394
BLZF1	-0.00423923	1.20332e-08	0.000249533
LINC01018	-0.0048666	1.30795e-08	0.000271216
BMS1P5	-0.00505109	1.37541e-08	0.000285192
LRRFIP1	-0.00442293	1.43942e-08	0.000298449
LOC100128288	-0.00430041	1.45533e-08	0.000301734
WDR12	0.00923808	2.10072e-08	0.000435521
YRDC	-0.0053936	2.12237e-08	0.000439988
TSEN15	0.00841133	2.21337e-08	0.000458832
FAM63A	-0.00591824	2.29395e-08	0.000475512
ALG10	0.00738095	2.73756e-08	0.000567441
DNAJB11	0.0105176	2.74256e-08	0.00056845
MFSD11	-0.0068875	3.60826e-08	0.000747849
SLIRP	0.0124918	4.10342e-08	0.000850433
ZNF14	-0.00489339	4.66594e-08	0.000966969
PCED1A	-0.00640424	5.03091e-08	0.00104256
ZW10	0.0115102	6.16471e-08	0.00127745
PSMA6	0.00831331	7.27395e-08	0.00150723
PSMD14	0.0102811	7.34135e-08	0.00152113
MFSD14C	-0.00454789	7.55174e-08	0.00156464
RAMP2-AS1	-0.00570284	8.71383e-08	0.00180533
SAFB2	-0.00841572	9.89394e-08	0.00204973
UBE2V2	0.0106267	1.05164e-07	0.00217858
DCLK2	-0.0109841	1.13834e-07	0.00235807
CMSS1	0.00716081	1.18669e-07	0.00245811
PGAM1	0.00554473	1.25296e-07	0.00259525
MAGT1	-0.00453785	1.31972e-07	0.0027334
TMED10P1	0.0103054	1.59204e-07	0.00329727
PLXNB1	-0.00614339	1.64022e-07	0.0033969
SDHAP2	-0.00377011	1.65718e-07	0.00343185
ELOVL5	0.00808845	1.98437e-07	0.00410923
SUGP2	-0.00834563	2.082e-07	0.00431119
PPIL1	0.00664925	2.23829e-07	0.00463461
PAXIP1-AS1	-0.00449089	2.60727e-07	0.00539835
AOC4P	-0.00429286	2.72159e-07	0.00563477
HMBS	0.00493677	2.86882e-07	0.00593933
TSPAN3	0.00683711	3.63801e-07	0.00753141
TDRD1	-0.00400254	4.59444e-07	0.00951096
PSMD6	0.0090315	4.6624e-07	0.00965117
ATP1B3	0.00499251	4.69621e-07	0.00972069
UTP18	0.00797247	5.55981e-07	0.0115077
ZNF438	-0.00731932	6.21256e-07	0.0128581
MYH3	-0.00971863	7.36593e-07	0.0152445
DNAL1	0.00694193	7.40175e-07	0.0153179
INTS3	-0.00666983	7.49601e-07	0.0155122
SRP9	0.00546612	7.75523e-07	0.0160479
UCKL1	-0.00828109	7.86742e-07	0.0162793
TDO2	0.00436973	7.89447e-07	0.0163344
ZNF876P	-0.00580559	8.86937e-07	0.0183507
HNRNPA1	0.00413845	9.66717e-07	0.0200004
USP49	-0.00425897	1.06306e-06	0.0219926
HECTD4	-0.00660689	1.14084e-06	0.0236006
OSTC	0.0083101	1.19395e-06	0.024698
VBP1	0.00840302	1.22008e-06	0.0252374
SUCLA2	0.00633518	1.28077e-06	0.0264915
NSUN5	-0.0055231	1.50563e-06	0.0311409
ATP5F1	0.00684362	1.51828e-06	0.0314011
HSPE1	0.00731092	1.52604e-06	0.0315601
PTGES2	0.00651002	1.53121e-06	0.0316655
CHMP3	0.00674022	1.62327e-06	0.0335677
DNAJA1	0.00992259	1.70292e-06	0.035213
VCP	0.00806075	1.71539e-06	0.0354691
ZNF763	-0.00503801	1.8222e-06	0.0376758
SH3GL1	0.00772539	1.83295e-06	0.0378962
AGAP6	-0.00375916	1.86069e-06	0.0384678
POLE3	0.0112752	1.94928e-06	0.0402975
DDX21	0.00637633	2.03768e-06	0.042123
RBM6	-0.00469186	2.1815e-06	0.0450938
APBB3	-0.00475808	2.26653e-06	0.0468492
DOLPP1	0.00804643	2.28016e-06	0.0471287
TMEM219	-0.00855145	2.36862e-06	0.0489547
