# Supplementary material
Source: Research Square preprint supplement (doi:10.21203/rs.3.rs-8764864/v1)
Supplement: Supplementary file 4 [file cc940309a9b3ac8960079ab8.xlsx]

## Sheet: Table
Study (GSE)	Focus	Tissue	Number of Subjects / Samples	Platform	Metric
GSE234368	RNA-seq during menstrual cycle	Endometrium	118 in proliferative phases; 150 in secretory phase	RNA-seq	DIG
GSE223817	DNA methylation during menstrual cycle	Endometrium	190 in proliferative phase; 157 in secretory phase	Illumina Infinium Methylation EPIC BeadChip	X-Ra
GSE37722	DNA methylation during pregnancy monitoring	Blood	56–14 Early pregnancy; 14 Mid pregnancy; 14 Late pregnancy	Illumina HumanMethylation27 BeadChip	X-Ra
GSE107459	DNA methylation for pregnancy complications	Blood	7–15 weeks; 62 Mid-pregnancy; 24–52 weeks	Illumina HumanMethylation450 BeadChip	X-Ra
GSE226206	DNA methylation during COVID recovery survivors	Blood	JCI: 82; admission: 29; discharge: 23; time point 4	Illumina Infinium Methylation EPIC array	X-Ra
TruDiagnostic	DNA methylation for probability of given birth	Blood	1,414 females	Illumina Infinium Methylation EPIC array	X-Ra
GSE43501	DNA methylation for cattle subfertility	Blood	24 lactating dairy cows; 10 cycling; 12 pregnant	Illumina Ovine 4K array	X-Ra
GSE223748	DNA methylation for reproduction capacity across mammals	Blood	1,686 female individuals from 22 species	Mammalian Methylation Array (GPL28271)	X-Ra
